# Supplementary material for: Therapeutic Effect of Nebulized Hypertonic Saline for Muco-Obstructive Lung Diseases: A Systematic Review and Meta-Analysis with Trial Sequential Analysis
Source: HighWire-hosted journal article supplement (doi:10.1136/jim-2020-001479), 2020-12-03
Supplement: jim-2020-001479supp001_data_supplement.pdf [file jim-2020-001479supp001_data_supplement.pdf]

**Table S1: Details of search strategy**

| Search strategy for PubMed database (from its inception to June, 2019) |                                                                                                                                                                                                                                                                                                                                                                                                                                                                                                                                                                                                                                                                                                                                                                                                                                                                                                                                                                                                                                                                                                                                                                                                                                                                                                                                                                                                                                                                                                                                                                                                                                                                                                                                                                                                                                                                                                                                                                                                                                                                                                                                                                                                                                                                                                                                                                                                                                                                                                                                                                                                                                                                                                                                                                                          |             |
|------------------------------------------------------------------------|------------------------------------------------------------------------------------------------------------------------------------------------------------------------------------------------------------------------------------------------------------------------------------------------------------------------------------------------------------------------------------------------------------------------------------------------------------------------------------------------------------------------------------------------------------------------------------------------------------------------------------------------------------------------------------------------------------------------------------------------------------------------------------------------------------------------------------------------------------------------------------------------------------------------------------------------------------------------------------------------------------------------------------------------------------------------------------------------------------------------------------------------------------------------------------------------------------------------------------------------------------------------------------------------------------------------------------------------------------------------------------------------------------------------------------------------------------------------------------------------------------------------------------------------------------------------------------------------------------------------------------------------------------------------------------------------------------------------------------------------------------------------------------------------------------------------------------------------------------------------------------------------------------------------------------------------------------------------------------------------------------------------------------------------------------------------------------------------------------------------------------------------------------------------------------------------------------------------------------------------------------------------------------------------------------------------------------------------------------------------------------------------------------------------------------------------------------------------------------------------------------------------------------------------------------------------------------------------------------------------------------------------------------------------------------------------------------------------------------------------------------------------------------------|-------------|
| No.                                                                    | Search strategy                                                                                                                                                                                                                                                                                                                                                                                                                                                                                                                                                                                                                                                                                                                                                                                                                                                                                                                                                                                                                                                                                                                                                                                                                                                                                                                                                                                                                                                                                                                                                                                                                                                                                                                                                                                                                                                                                                                                                                                                                                                                                                                                                                                                                                                                                                                                                                                                                                                                                                                                                                                                                                                                                                                                                                          | Items found |
| #1                                                                     | ((((((((("hypertone"[All Fields] OR "hypertonic"[All Fields]) OR "hypertonics"[All Fields]) OR "muscle hypertonia"[MeSH Terms]) OR ("muscle"[All Fields] AND "hypertonia"[All Fields])) OR "muscle hypertonia"[All Fields]) OR "hypertonicity"[All Fields]) OR ("high"[All Fields] AND (((("osmosis"[MeSH Terms] OR "osmosis"[All Fields]) OR "osmotic"[All Fields]) OR "osmotical"[All Fields]) OR "osmotically"[All Fields]) OR "osmotics"[All Fields]))) OR 3[UID]) OR 5[UID]) OR 7[UID]                                                                                                                                                                                                                                                                                                                                                                                                                                                                                                                                                                                                                                                                                                                                                                                                                                                                                                                                                                                                                                                                                                                                                                                                                                                                                                                                                                                                                                                                                                                                                                                                                                                                                                                                                                                                                                                                                                                                                                                                                                                                                                                                                                                                                                                                                              | 45390       |
| #2                                                                     | ((((("saline solution"[MeSH Terms] OR ("saline"[All Fields] AND "solution"[All Fields])) OR "saline solution"[All Fields]) OR "saline"[All Fields]) OR "salines"[All Fields]) OR (((((((("pharmaceutical solutions"[Pharmacological Action] OR "solutions"[MeSH Terms]) OR "solutions"[All Fields]) OR "solution"[All Fields]) OR "pharmaceutical solutions"[MeSH Terms]) OR ("pharmaceutical"[All Fields] AND "solutions"[All Fields])) OR "pharmaceutical solutions"[All Fields]) OR "solotal"[All Fields]) OR "solute"[All Fields]) OR "solute s"[All Fields]) OR "soluted"[All Fields]) OR "solute s"[All Fields]) OR ("solution s"[All Fields]) OR ((("sodium chloride"[MeSH Terms] OR ("sodium"[All Fields] AND "chloride"[All Fields])) OR "sodium chloride"[All Fields])                                                                                                                                                                                                                                                                                                                                                                                                                                                                                                                                                                                                                                                                                                                                                                                                                                                                                                                                                                                                                                                                                                                                                                                                                                                                                                                                                                                                                                                                                                                                                                                                                                                                                                                                                                                                                                                                                                                                                                                                         | 965,26<br>6 |
| #3                                                                     | ((((((((("cystic fibrosis"[MeSH Terms] OR ("cystic"[All Fields] AND "fibrosis"[All Fields])) OR "cystic fibrosis"[All Fields]) OR (((("cerebrospinal fluid"[MeSH Subheading] OR ("cerebrospinal"[All Fields] AND "fluid"[All Fields])) OR "cerebrospinal fluid"[All Fields]) OR "cf"[All Fields])) OR (((("cystic fibrosis"[MeSH Terms] OR ("cystic"[All Fields] AND "fibrosis"[All Fields])) OR "cystic fibrosis"[All Fields]) OR "mucoviscidosis"[All Fields])) OR (((("pulmonary disease, chronic obstructive"[MeSH Terms] OR ((("pulmonary"[All Fields] AND "disease"[All Fields]) AND "chronic"[All Fields]) AND "obstructive"[All Fields])) OR "chronic obstructive pulmonary disease"[All Fields]) OR "copd"[All Fields])) OR (((("pulmonary disease, chronic obstructive"[MeSH Terms] OR ((("pulmonary"[All Fields] AND "disease"[All Fields]) AND "chronic"[All Fields]) AND "obstructive"[All Fields])) OR "chronic obstructive pulmonary disease"[All Fields]) OR (((("chronic"[All Fields] AND "obstructive"[All Fields]) AND "pulmonary"[All Fields]) AND "disease"[All Fields])) OR (((("pulmonary disease, chronic obstructive"[MeSH Terms] OR ((("pulmonary"[All Fields] AND "disease"[All Fields]) AND "chronic"[All Fields]) AND "obstructive"[All Fields])) OR "chronic obstructive pulmonary disease"[All Fields]) OR (((("chronic"[All Fields] AND "obstructive"[All Fields]) AND "lung"[All Fields]) AND "disease"[All Fields])) OR "chronic obstructive lung disease"[All Fields])) OR (((("pulmonary disease, chronic obstructive"[MeSH Terms] OR ((("pulmonary"[All Fields] AND "disease"[All Fields]) AND "chronic"[All Fields]) AND "obstructive"[All Fields])) OR "chronic obstructive pulmonary disease"[All Fields]) OR (((("chronic"[All Fields] AND "obstructive"[All Fields]) AND "airway"[All Fields]) AND "disease"[All Fields])) OR "chronic obstructive airway disease"[All Fields])) OR (((("bronchiectasies"[All Fields] OR "bronchiectasis"[MeSH Terms]) OR "bronchiectasis"[All Fields]) OR "bronchiectases"[All Fields])) OR (((("ciliary motility disorders"[MeSH Terms] OR ("ciliary"[All Fields] AND "motility"[All Fields]) AND "disorders"[All Fields])) OR "ciliary motility disorders"[All Fields]) OR ((("primary"[All Fields] AND "ciliary"[All Fields]) AND "dyskinesia"[All Fields])) OR "primary ciliary dyskinesia"[All Fields])) OR ("prev chronic dis"[Journal] OR "pcd"[All Fields])) OR ("muco-obstructive"[All Fields] AND (((("disease"[MeSH Terms] OR "disease"[All Fields]) OR "diseases"[All Fields]) OR "disease s"[All Fields]) OR "diseased"[All Fields])) OR ("muco-obstructive"[All Fields] AND ((("lung diseases"[MeSH Terms] OR ("lung"[All Fields] AND "diseases"[All Fields])) OR "lung diseases"[All Fields])) | 291686      |
| #4                                                                     | #1 AND #2 AND #3                                                                                                                                                                                                                                                                                                                                                                                                                                                                                                                                                                                                                                                                                                                                                                                                                                                                                                                                                                                                                                                                                                                                                                                                                                                                                                                                                                                                                                                                                                                                                                                                                                                                                                                                                                                                                                                                                                                                                                                                                                                                                                                                                                                                                                                                                                                                                                                                                                                                                                                                                                                                                                                                                                                                                                         | 786         |
| Search strategy for EMBASE database (from its inception to June, 2019) |                                                                                                                                                                                                                                                                                                                                                                                                                                                                                                                                                                                                                                                                                                                                                                                                                                                                                                                                                                                                                                                                                                                                                                                                                                                                                                                                                                                                                                                                                                                                                                                                                                                                                                                                                                                                                                                                                                                                                                                                                                                                                                                                                                                                                                                                                                                                                                                                                                                                                                                                                                                                                                                                                                                                                                                          |             |
| No.                                                                    | Search strategy                                                                                                                                                                                                                                                                                                                                                                                                                                                                                                                                                                                                                                                                                                                                                                                                                                                                                                                                                                                                                                                                                                                                                                                                                                                                                                                                                                                                                                                                                                                                                                                                                                                                                                                                                                                                                                                                                                                                                                                                                                                                                                                                                                                                                                                                                                                                                                                                                                                                                                                                                                                                                                                                                                                                                                          | Items found |

|    |                                                                                                                                                                                                                                                     |        |
|----|-----------------------------------------------------------------------------------------------------------------------------------------------------------------------------------------------------------------------------------------------------|--------|
| #1 | hypertonic OR high osmotic OR 3% OR 5% OR 7%                                                                                                                                                                                                        | 326470 |
|    |                                                                                                                                                                                                                                                     | 64     |
| #2 | saline OR solution OR Sodium Chloride                                                                                                                                                                                                               | 100264 |
|    |                                                                                                                                                                                                                                                     | 8      |
| #3 | cystic fibrosis OR CF OR mucoviscidosis OR COPD OR chronic obstructive pulmonary disease OR chronic obstructive lung disease OR chronic obstructive airway disease OR bronchiectasis OR muco-obstructive diseases OR muco-obstructive lung diseases | 299656 |
| #4 | #1 AND #2 AND #3                                                                                                                                                                                                                                    | 9674   |

Search strategy for CENTRAL database (from its inception to June, 2019)

| No. | Search strategy                                                                                                                                 | Items found |
|-----|-------------------------------------------------------------------------------------------------------------------------------------------------|-------------|
| #1  | hypertonic OR high osmotic OR 3% OR 5% OR 7%                                                                                                    | 113612      |
|     |                                                                                                                                                 | 9           |
| #2  | saline OR solution OR Sodium Chloride                                                                                                           | 64042       |
|     | cystic fibrosis OR CF OR mucoviscidosis OR COPD OR chronic obstructive pulmonary disease OR chronic                                             |             |
| #3  | obstructive lung disease OR chronic obstructive airway disease OR bronchiectasis OR muco-obstructive diseases OR muco-obstructive lung diseases | 33078       |
| #4  | #1 AND #2 AND #3                                                                                                                                | 1505        |

**Table S2: relevant ongoing studies in the international trial registers**

| ClinicalTrials.gov |      |
|--------------------|------|
| NCT02378467        | CF   |
| NCT00753987        | CF   |
| NCT01094704        | CF   |
| NCT01792271        | COPD |
| NCT02950883        | CF   |
| NCT01377792        | CF   |
| NCT01031706        | CF   |
| NCT02266875        | COPD |
| ISRCTN Registry    |      |
| ISRCTN89040295     | CF   |
| ISRCTN13083896     | CF   |

Table S3: Characteristic of included studies

| Study                          | Location              | Study design                           | Age (years)                                                             | Sample size | Intervention            | Control                    | Method                       | Outcomes                                     |
|--------------------------------|-----------------------|----------------------------------------|-------------------------------------------------------------------------|-------------|-------------------------|----------------------------|------------------------------|----------------------------------------------|
| Amin 2010                      | Canada (2008)         | Randomized controlled cross-over study | 6-18                                                                    | 19          | HS(7%)+ salbutamol      | NS(0.9%)+ salbutamol       | 2/day*4 weeks                | LCI, FEV1, FVC, FEF25-75, QOL (CFQ-R)        |
| Amin 2016                      | Canada (2012-2014)    | Randomized controlled cross-over study | 14.0 (7, 56)#                                                           | 18          | HS(7%)+ salbutamol      | NS(0.9%)+ salbutamol       | 5/day*2 weeks                | LCI, FEV1, FEF25-75                          |
| Dentice 2016                   | Australia (2005-2013) | RCT                                    | Con 27±9, 7%HS 28±9                                                     | 132         | HS(7%)                  | 0.12% saline               | 3/day during hospitalization | FEV1, FVC, QOL (SF36, CFQ)                   |
| Cystic fibrosis<br>Elkins 2006 | Australia (2000-2003) | RCT                                    | 18.4 ±9.3                                                               | 164         | HS(7%)+ quinine sulfate | NS(0.9%)+ quinine sulfate  | 2/day*48 weeks               | FEV1, FVC, FEF25-75, QOL (SF36, CFQ), PE, AE |
| Eng 1996                       | Australia (2008)      | RCT                                    | Con 16.7 (8, 36), HS 16.1 (7, 25)#<br>3%HS 10.6 ±2.87, 7%HS 10.87 ±3.64 | 52          | HS(6%)                  | NS(0.9%)                   | 2/day*2 weeks                | FEV1, FVC, QOL (VAS), AE                     |
| Gupta 2012                     | India                 | RCT                                    | 10.5 (8.9 - 12.4) &                                                     | 30          | HS(7%)                  | HS(3%)                     | 2/day*28 days                | FEV1, FVC, PEFR, QOL (VAS)                   |
| Laube 2011                     | US                    | Randomized controlled                  | 10.5 (8.9 - 12.4) &                                                     | 12          | HS(7%)+ salbutamol      | saline(0.12%) + salbutamol | 1/2weeks, 3 times in total   | MCC                                          |

|                |                            |                                        |                             |     |                                   |                                     |                 |                                    |  |
|----------------|----------------------------|----------------------------------------|-----------------------------|-----|-----------------------------------|-------------------------------------|-----------------|------------------------------------|--|
|                |                            | cross-over study                       |                             |     |                                   |                                     |                 |                                    |  |
| Mainz 2016     | Germany (2010-2013)        | Randomized controlled cross-over study | 22.8 ± 12                   | 64  | HS(6%)                            | NS(0.9%)                            | 1/day*28 days.  | FEV1                               |  |
| Nenna 2017     | Italy (2012-2013)          | Randomized controlled cross-over study | 5.7 ± 0.8                   | 12  | HS(7%)                            | NS(0.9%)                            | 2/day*16 weeks  | FEV1, FVC, FEF25-75,               |  |
| Riedler 1996   | Australia                  | Randomized controlled cross-over study | 16.5 (13-20)#               | 10  | HS(6%)                            | NS(0.9%)                            | 1/day*1 time    | FEV1, QOL (VSA)                    |  |
| Robinson 1996  | Australia                  | Randomized controlled cross-over study | 21.9 (18-28)#               | 12  | HS(7%)                            | NS(0.9%)                            | 1/day*1 time    | MCC, FEV1                          |  |
| Robinson 1997  | Australia                  | Randomized controlled cross-over study | 22.1 ± 3.8                  | 10  | HS(12%),HS(7%),HS(3%)             | NS(0.9%)                            | 1/day*1 time    | MCC, FEV1                          |  |
| Rosenfeld 2012 | USA and Canada (2009-2011) | RCT                                    | Con 2.3 ± 1.5, HS 2.2 ± 1.4 | 321 | HS(7%)+ albuterol or levalbuterol | NS(0.9%)+ albuterol or levalbuterol | 2/day*48 weeks  | FEV0.5, FEF25-75, QOL(CFQ), PE, AE |  |
| Stahl 2018     | Germany (2012-2015)        | RCT                                    | 0.26 ± 0.08                 | 40  | HS(6%)                            | NS(0.9%)                            | 2/day*12 months | LCI                                |  |

|                                       |                      |                         |                                        |                              |    |                    |                      |                 |                                                        |
|---------------------------------------|----------------------|-------------------------|----------------------------------------|------------------------------|----|--------------------|----------------------|-----------------|--------------------------------------------------------|
| Non-Cystic fibrosis<br>Bronchiectasis | Kellett 2005         | UK                      | Randomized controlled cross-over study | Females 55±3.6, Males 64±3.8 | 23 | HS(7%)+terbutaline | NS(0.9%)+terbutaline | 1/week*4 week   | Ease of expectoration (VAS), FEV1, FVC                 |
|                                       | Kellett 2011         | UK                      | Randomized controlled cross-over study | 56.6±14.6                    | 28 | HS(7%)             | NS (0.9%)            | 1/day*3 months  | FEV1, FVC, QOL(St George), ease of expectoration (VAS) |
|                                       | Nicolson 2012        | Australia (2008-2009)   | RCT                                    | Con 56±15, HS 58±15          | 40 | HS (6%)            | NS (0.9%)            | 2/day*12 months | Ease of expectoration (VAS), FEV1, FEF25-75%           |
|                                       | Herrero-Cortina 2018 | Spain (2015)            | Randomized controlled cross-over study | 64.0±17.5 months             | 28 | HS (7%)            | NS (0.9%)            | 1/day*4 times   | Sputum expectoration, FEV1, FVC, AE                    |
| COPD                                  | Clarke 1979          | US                      | Randomized controlled cross-over study | 62.8±8.0                     | 22 | HS (7.1%)          | NS (0.9%)            | 2/day*3 days    | Lung clearance, lung function                          |
|                                       | Valderramas 2009     | Brasil (2004-2006)      | RCT                                    | Con 67±6.5; 3%HS 68±6.5      | 68 | HS(3%)+salbutamol  | NS(0.9%)+salbutamol  | 3/week*8 weeks  | QOL, AE                                                |
| PCD                                   | Tamara 2017          | Netherlands (2014-2015) | Randomized controlled cross-over study | 47.6 (26.9-58.1) #           | 22 | HS(7%)             | NS(0.9%)             | 2/day*12 weeks  | QOL(SGRQ, QOL-B), ease of expector                     |

ation  
(VAS)

---

HS: hypertonic saline, NS: normal saline, RCT: Randomized controlled study, PCD: primary ciliary dyskinesia, COPD: chronic obstructive pulmonary disease, AE: adverse event, MCC: mucociliary clearance, LCI: lung clearance index, RDAI: Respiratory Distress Assessment Instrument, FEV1: forced expiratory volume in 1 second, FVC: forced vital capacity, PEF: peak expiratory flow, QOL: quality of life, VSA: visual analogue score, SGRQ: St George's Respiratory Questionnaire, ED: emergency department, \*: median (25th, 75th), #: median (range), &: median (IQR). 2/day\*12 weeks: Twice daily inhalations for 12 weeks.
