# Supplementary material for: Therapeutic Effect of Nebulized Hypertonic Saline for Muco-Obstructive Lung Diseases: A Systematic Review and Meta-Analysis with Trial Sequential Analysis
Source: HighWire-hosted journal article supplement (doi:10.1136/jim-2020-001479), 2020-12-03
Supplement: jim-2020-001479supp002_data_supplement.pdf [file jim-2020-001479supp002_data_supplement.pdf]

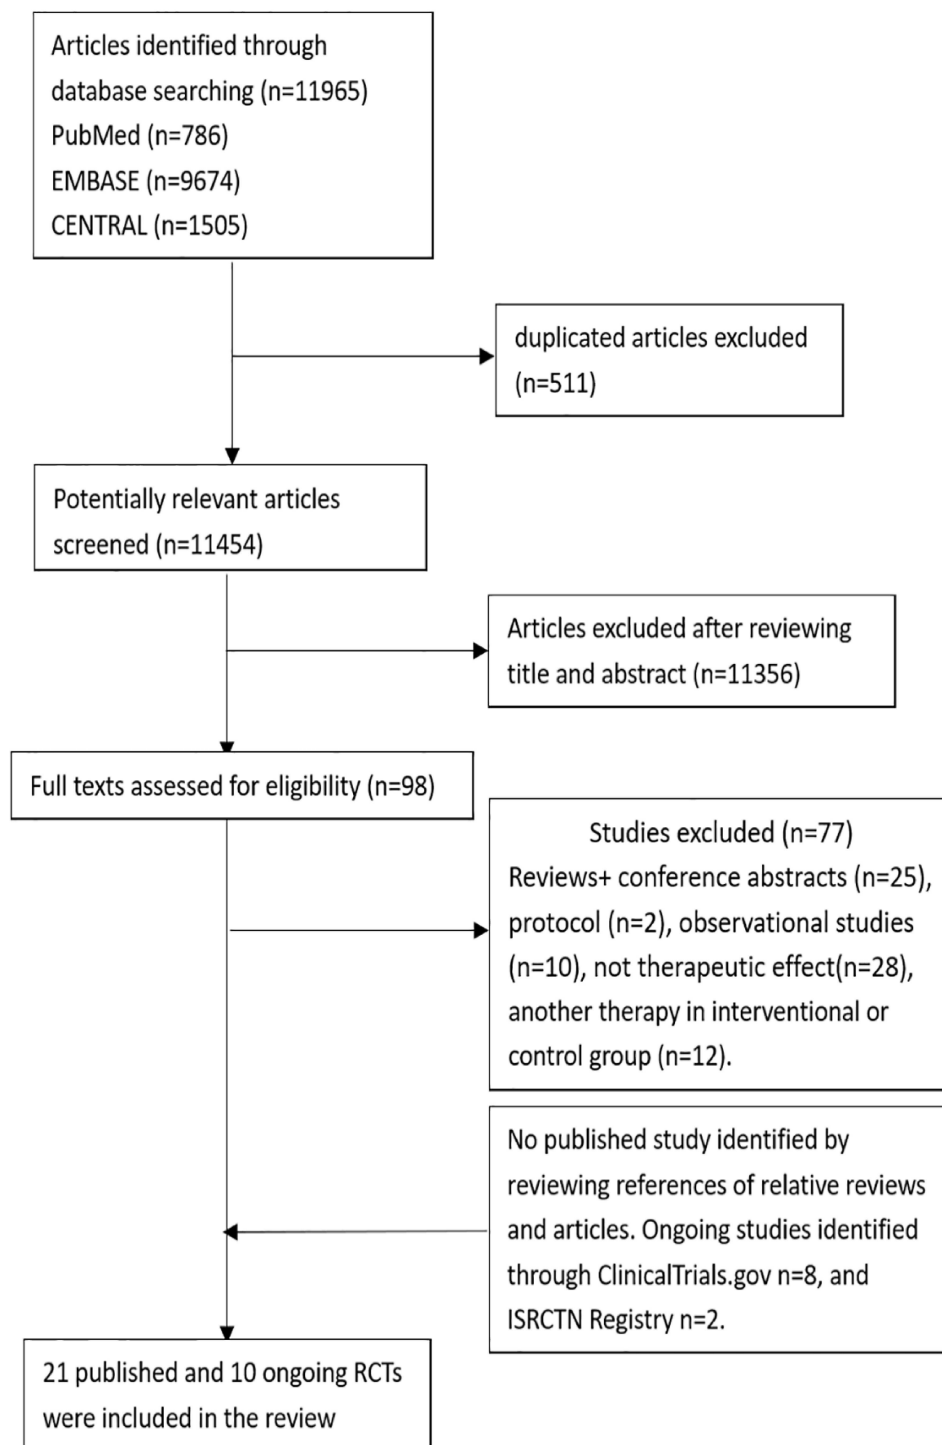

Figure S1: The flow diagram of identifying relevant studies

|                     | Random sequence generation (selection bias) | Allocation concealment (selection bias) | Blinding of participants and personnel (performance bias) | Blinding of outcome assessment (detection bias) | Incomplete outcome data (attrition bias) | Selective reporting (reporting bias) | Other bias |
|---------------------|---------------------------------------------|-----------------------------------------|-----------------------------------------------------------|-------------------------------------------------|------------------------------------------|--------------------------------------|------------|
| Amin 2010           | +                                           | +                                       | ?                                                         | +                                               | +                                        | +                                    | +          |
| Amin 2016           | +                                           | +                                       | ?                                                         | +                                               | +                                        | +                                    | +          |
| Clarke 1979         | +                                           | ?                                       | +                                                         | +                                               | +                                        | ?                                    | ?          |
| Dentice2016         | ?                                           | ?                                       | +                                                         | +                                               | +                                        | +                                    | +          |
| Elkins 2006         | +                                           | +                                       | +                                                         | +                                               | +                                        | +                                    | +          |
| Eng 1996            | +                                           | ?                                       | ?                                                         | +                                               | +                                        | +                                    | +          |
| Forouzan2017        | +                                           | ?                                       | +                                                         | +                                               | ?                                        | ?                                    | ?          |
| Herrero-Cortina2018 | +                                           | +                                       | ?                                                         | ?                                               | ?                                        | ?                                    | ?          |
| Kellett2005         | +                                           | ?                                       | ?                                                         | ?                                               | ?                                        | ?                                    | ?          |
| Kellett2011         | ?                                           | ?                                       | -                                                         | ?                                               | +                                        | +                                    | ?          |
| Laube 2009          | ?                                           | ?                                       | ?                                                         | ?                                               | +                                        | +                                    | +          |
| Mainz 2016          | ?                                           | ?                                       | ?                                                         | ?                                               | +                                        | +                                    | +          |
| Nenna 2017          | +                                           | +                                       | -                                                         | ?                                               | +                                        | +                                    | ?          |
| Nicolson2012        | +                                           | +                                       | +                                                         | +                                               | +                                        | +                                    | +          |
| Riedler 1996        | +                                           | +                                       | ?                                                         | ?                                               | ?                                        | ?                                    | +          |
| Robinson1996        | ?                                           | ?                                       | -                                                         | ?                                               | +                                        | +                                    | ?          |
| Robinson1997        | ?                                           | ?                                       | ?                                                         | ?                                               | +                                        | +                                    | ?          |
| Rosenfeld 2012      | +                                           | +                                       | +                                                         | +                                               | +                                        | +                                    | +          |
| Stahl 2018          | ?                                           | ?                                       | ?                                                         | ?                                               | +                                        | +                                    | ?          |
| Tamara 2017         | +                                           | +                                       | +                                                         | +                                               | +                                        | +                                    | +          |
| Valderramas 2009    | +                                           | +                                       | +                                                         | +                                               | ?                                        | ?                                    | +          |

Figure S2: Risk of bias summary.

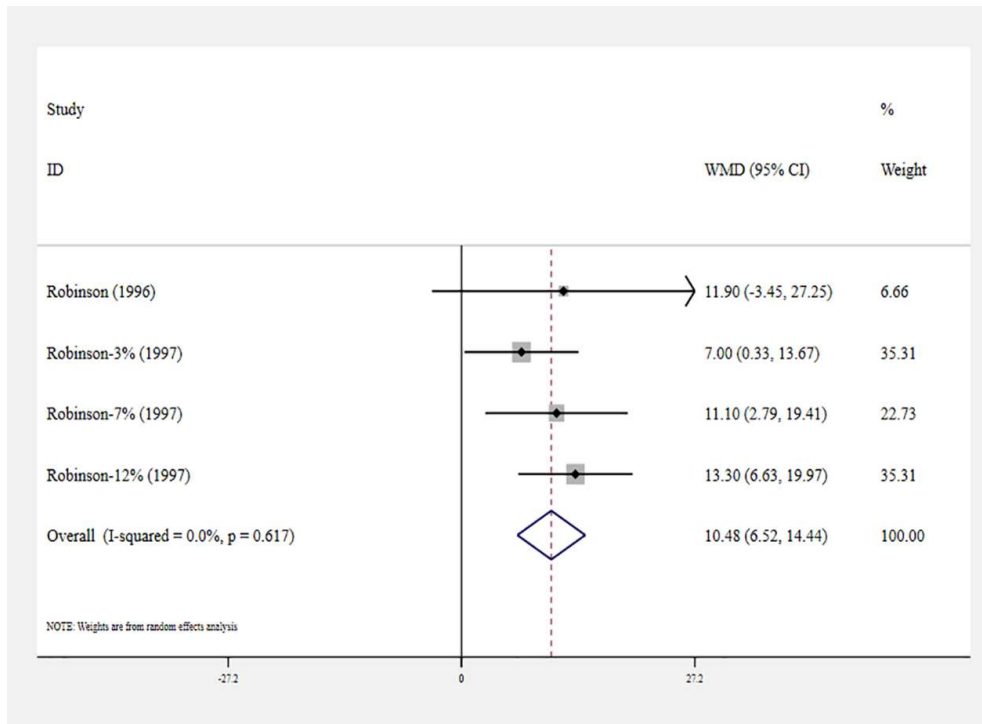

**Figure S3: The effects of nebulized hypertonic saline treatment on the MCC in 90minutes in CF.**

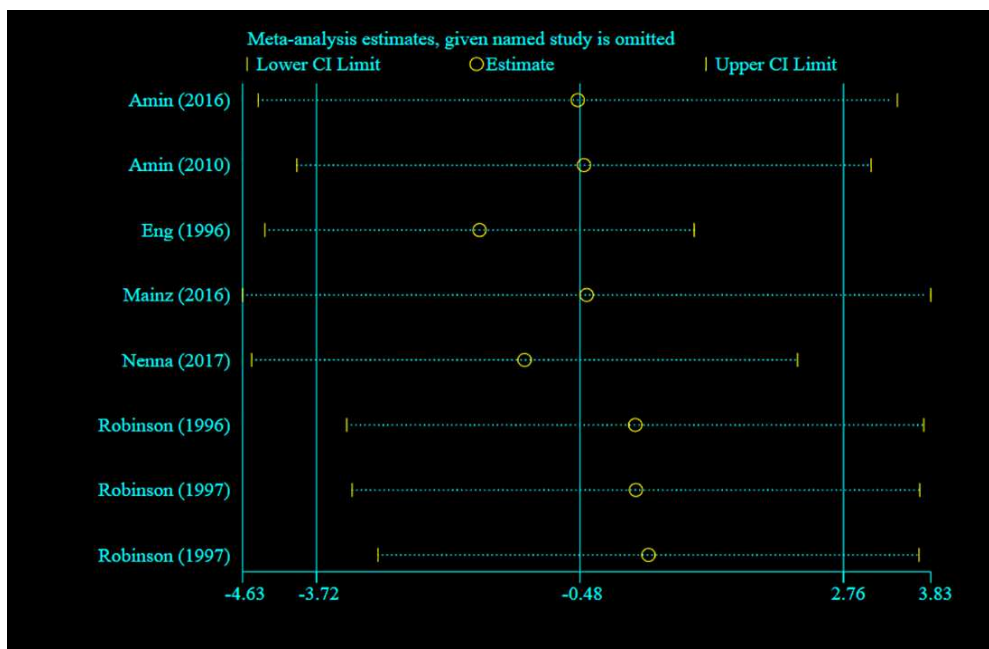

**Figure S4: Sensitivity analysis for FEV1 in CF: exclusion of a single study in turn. The study being cited on the left is the one being left out in each analysis.**

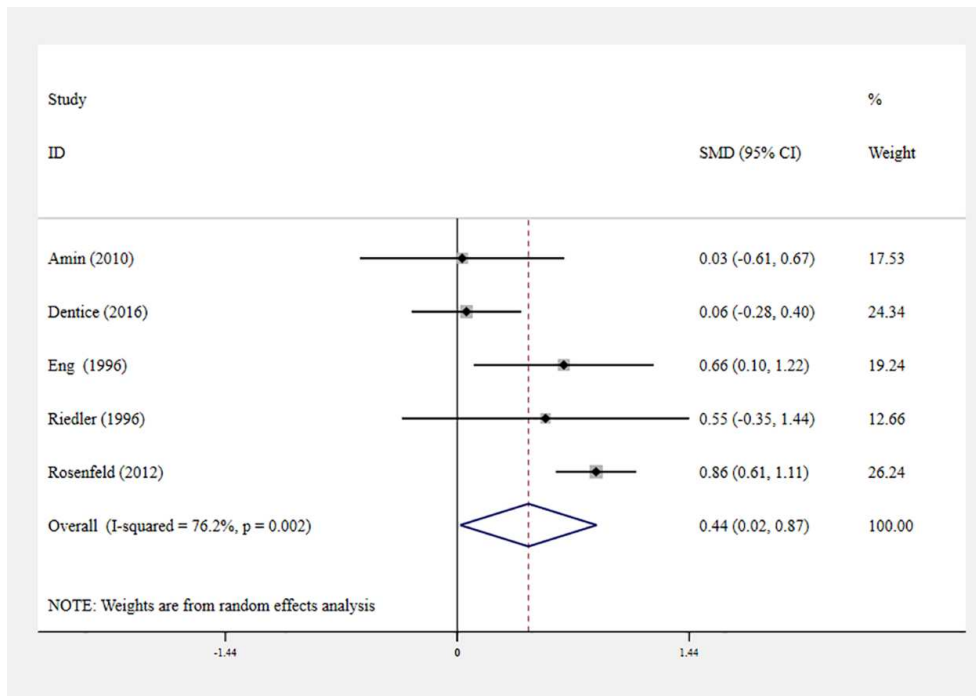

**Figure S5: The effects of nebulized hypertonic saline treatment on the quality of life in CF.**
